# Supplementary material
Source: PubMed Central journal article supplement (PMC3251132)
Supplement: 1117094108_pnas.1117094108_SI.pdf [file 1117094108_pnas.1117094108_SI.pdf]

# Supporting Information

Haas et al. 10.1073/pnas.1117094108

## SI Materials and Methods

**Cloning and Expression of Zebrafish (zf)12-LO in *Pichia pastoris*.** The coding sequence of *alox12* was amplified via RT-PCR using total RNA from embryos [two days post fertilization (dpf)], Pfx-Polymerase and the following primers: *zfalox12* coding sequence for: 5'-CGACAACCTTGAGAAGATCAAATGCACCATCATCAC-CACCATGAGTACAAAGTGACAGTGGC-3', *zfalox12* coding sequence rev: 5'-GCAAGACCGGTCTTCTCTCAAATAGTG-ATGCTGTTTTCCA-3'. The amplified cDNA was cloned into the pPICZ A vector (Invitrogen, Sweden) via in vivo recombination. Transformed bacteria were selected with Zeocine. Positive colonies were amplified and the resulting plasmid was purified, sequenced, and restricted with *PmeI* for transformation of *Pichia pastoris*. Yeast cells were transformed following Invitrogen manual of the EasySelect™ *Pichia* Expression Kit. For expression, an overnight culture was diluted 1:1,000 in Buffered Minimal Glycerol medium (Invitrogen formula), pH 6.8, and incubated 72 h at 26 °C. The OD<sub>600</sub>-value of the preculture was measured, cells were harvested (3,000 × g, 4 °C, 7 min), the pellet was resuspended in Buffered Minimal Methanol medium (Invitrogen formula) to reach an OD<sub>600</sub> 20–30, and cells were incubated 48 h at 26 °C. To extract the protein, cells were harvested (3,000 × g, 4 °C, 7 min) and resuspended in 1/100 expression volume breaking buffer (100 mM Tris/HCl, pH 8, 100 mM KCl, 10% glycerol, 5 mM mercaptoethanol). An equal volume of glass beads was added and cells were broken by stirring the mixture with a bead beater (Biospec Products, Bartlesville, USA) (6 × 1 min, 10 min break). Glass beads were removed by filtration and the resulting solution was centrifuged (10,000 × g, 4 °C, 7 min) to remove the broken cells. To precipitate DNA, 10% streptomycin sulfate (Sigma, Sweden) was added drop wise followed by incubation on ice for 30 min and centrifugation (10,000 × g, 10 min, 4 °C). Imidazol was added to the supernatant to a final concentration of 20 mM. Recombinant zf12-LO was purified by affinity chromatography on a Ni<sup>2+</sup>-nitrilotriacetic acid column. Equilibration of the column was done with 25 mM Tris/HCl, pH 7.8/20 mM Imidazol. The enzyme containing supernatant was applied, followed by a washing step with 25 mM Tris/HCl, pH 7.8/20 mM Imidazol and 25 mM Tris/HCl, pH 7.8/1 M KCl/40 mM Imidazol, respectively. Finally, the protein was eluted with 25 mM Tris/HCl, pH 7.8/100 mM Imidazol.

## Antibody Production and IgG Purification

Polyclonal rabbit anti-zf12-LO antiserum was raised by subcutaneous injections of 30 µg of purified enzyme mixed with complete Freund's adjuvant (Sigma) in the neck skin of a rabbit. Booster injections using the same amount of enzyme and adjuvant were given after 4 and 6 w. Blood (30 mL) was drawn week 8 and allowed to coagulate at room temperature followed by centrifugation (2,000 rpm, 10 min, Hereus Sepatech rotor #2705). The IgG fraction of the antiserum was obtained by chromatography on a Protein A Hi Trap column (GE Healthcare) according to the manufacturer's instructions. After elution of IgG with 4 mL of glycine buffer (0.1 M pH 3.0) the buffer was changed on a PD-10 column (GE Healthcare) eluted with 75 mM Tris/HCl, pH 7.0, and frozen in aliquots. The polyclonal rabbit anti-zf12-LO antiserum detected exogenously expressed zf12-LO as a band migrating at approximately 77 kDa on immunoblots in agreement with the expected molecular weight.

**RT-PCR.** To verify the knock-down of zf12-LO, RT-PCR analyses were performed. Total RNA was isolated from 20 embryos (two dpf) using the TRIzol reagent method (Invitrogen, Sweden) and used for first-strand cDNA synthesis using reverse transcription with Superscript II (Invitrogen, Sweden). PCR analyses were performed using Taq-Polymerase in a 2720 Thermal Cycler (Applied Biosystems) according to the manufacturer's instructions. (Primers: PCR<sub>zfalox12</sub> forward primer: 5'-ATCCTGGCCTG-GACTTCTG-3', PCR<sub>zfalox12</sub> reverse primer: 5'-GGTCACTCC AGGACTTTCCA-3'). For controlling the sequence of the PCR products an automated sequencing was performed (SEQLAB, Göttingen, Germany).

**Plastic Embedding, Sectioning of Embryos, and Staining.** Representative embryos of every injection (10 of each) were fixed in Bouin's fixative (Polysciences, Warrington, PA) overnight at 4 °C. Afterwards embryos were washed with 70% ethanol at room temperature in 30 min periods until no yellow color was seen in the washing solution, followed by an ethanol dehydration serial at room temperature, 30 min for each step (1 × 80% EtOH, 1 × 95% EtOH, 2 × 100% EtOH). For embedding, embryos were infiltrated with catalyzed JB4 resin (Polysciences, Warrington, PA) overnight at 4 °C. The embryos were then transferred to activated JB-4 and embedded in a mould. Sections (10 µm) were obtained using the Leica RM2155 microtome and counterstained with Hematoxylin/Eosin using standard procedures.

**Analysis of LO Activity in zf Embryos.** Approximately 100 embryos were washed two times with PBS followed by an incubation in 1 × PBS without Ca/1 mM EDTA, for 30 min at 37 °C. Embryos were homogenized using syringes with 22G needles followed by centrifugation (16,100 × g, 15 min, 4 °C). The supernatant was incubated with substrate mix (final concentration: 5 mM ATP, 1.3 mM CaCl<sub>2</sub>, 1.2 mM EDTA, 100 µM arachidonic acid, 10 µM 13-hydroperoxy-octadecadienoic acid, 77 mM Tris/HCl pH 7.5) for 30 min at 37 °C. Incubations were terminated by adding three reaction volumes of cold stop solution (60% acetonitrile, 40% H<sub>2</sub>O, 0.1% acetic acid vol/vol) including 3.3 µM 17(*S*)-hydroxy-(13*Z*, 19*Z*, 15*E*)-docosatrienoic acid as internal standard. Aliquots were injected onto a C18 HPLC column (Waters Nova Radial Pak), and arachidonic acid metabolites were isocratically eluted with acetonitrile/H<sub>2</sub>O/acetic acid (60:40:0.1, vol/vol) at a flow rate of 1 mL/min. The eluate was monitored at 235 nm for detection of hydroperoxy- and hydroxy-eicosatetraenoic acids (H(P)ETEs).

## Results

**Confirmation of the Knock-Down of zf12-LO in Embryos via RT-PCR and 12-HETE Measurement.** To prove that the incorrect splicing of the zf12-LO mRNA caused by MO-2 led to improper translation, RT-PCR analyses with total RNA isolated from wild type (WT) and morphants were performed. Analyses of the WT, MO-1, MO-1, and -2 mis PCR products showed an amplification of the corresponding product (497 bp) of the correctly spliced 12-LO mRNA. On the other hand, in the sample of MO-2 treated embryos four PCR products were amplified (Fig. S5A). Sequence analyses demonstrated that these products resulted from different splice variants of the 12-LO mRNA (Fig. S5B).

The expected PCR product that corresponds to the splice variant where exon 1 was directly linked to exon 3 after blockage of the second donor splice site by MO-2, was seen as a 292 bps fragment (Fig. S5 A and B, band 4). The 582 bps and 377 bps



human [R] GCTTADDLPLVLEHRKEEIRAKGDFYHWRVFLPGLPNVVDIPSYHPPPRCRNPNRPEWDGYPGPI LKINIKATRLNINLRYSEFKTASFFVRLGPMALAFKVRGLLD-CRHSWKRL 236  
mouse [R] GCTTADDLPLVLEHRKEEIRAKGDFYHWRVFLPGLPNVVDIPSYHPPPRCRNPNRPEWDGYPGPI LKINIKATRLNINLRYSEFKTASFFVRLGPMALAFKVRGLLD-CRHSWKRL 236  
xenopus GVLTLESVSPILKQRAAELELRQTHEWKTVAEGAP-----RCISADN-----VKDLPNDRFSEFKTISFGFDYLTSSIGPKLKYQL-CSDSWADI 205  
human [S] ARLPQGNALDMFKHREKELKDRQTYCNAWTKGELP-----LTTAADR-----KDDLPNDRFHEEKRLDFEWTLKAGALEMLKRVYT-LLSSWACL 200  
mouse [S] ARLPQGNALDMFKHREKELKDRQTYCNAWTKGELP-----LTTAADR-----KDDLPNDRFHEEKRLDFEWTLKAGALEMLKRVYT-LLSSWACL 200  
cow CRTVVDDPQGLFKHREELAERRKLYRWGMKDGIL-----LNTAGAT-----INDLPVDERFLEDKRIDFEASLTKGLADLAIKDSLNI-LITCWKSL 201  
zebrafish AKGLSESDPLLEMAHRSSELQRQKTYRWAWAPGLP-----KCIDAKS-----EADLPQDARFDNEKRSDFEGSLHYALELSSLKLAIKTRFGKSWSL 205

human [R] KDIRKIFPGKSVSEVVAEHWAEDETFGYQLNGLNPLGRIIRRCTRIPDKFVPTDDMVAFLGEGTCLQAELEKQNIYLADYRIMEGIPITVE LSGRQDHHCAPLCLLHFGPEGHMPIAI 356  
mouse [R] KDINIFPATKSVSEVVAEHWAEDETFGYQLNGLNPLGRIIRRCTRIPDKFVPTDDMVAFLGEGTCLQAELEKQNIYLADYRILDGIPITVE LNCQQDHHCAPMCLLHFGPDGMMPIAI 356  
xenopus NDIKRVFCQDQWTEISDLVSE LMKEDSFFGYQLNGLNPLGRIIRRCTRIPDKFVPTDDMVAFLGEGTCLQAELEKQNIYLADYKILEGIPITVINGEROYLAAPMLWKSQKNTYVPIAI 325  
human [S] EDFDQIFWQKSALEAKVRCQWQDELEF SYQFLNGLNPLGRIIRRCTRIPDKFVPTDDMVAFLGEGTCLQAELEKQNIYLADYKILEGIPITVINGEROYLAAPMLWKSQKNTYVPIAI 316  
mouse [S] EDFDQIFWQKSALEAKVRCQWQDELEF SYQFLNGLNPLGRIIRRCTRIPDKFVPTDDMVAFLGEGTCLQAELEKQNIYLADYKILEGIPITVINGEROYLAAPMLWKSQKNTYVPIAI 316  
cow IDFNRIFWQKSALEAKVRCQWQDELEF SYQFLNGLNPLGRIIRRCTRIPDKFVPTDDMVAFLGEGTCLQAELEKQNIYLADYKILEGIPITVINGEROYLAAPMLWKSQKNTYVPIAI 317  
zebrafish EDFRRIFWQKSALEAKVRCQWQDELEF SYQFLNGLNPLGRIIRRCTRIPDKFVPTDDMVAFLGEGTCLQAELEKQNIYLADYKILEGIPITVINGEROYLAAPMLWKSQKNTYVPIAI 325

human [R] QLS--QTPGDCPIFLPDSSEMDWLAKTWRYAEFYSHEAIAHLETHLTAEAFC LALRNLPMDHPLYKLLI PHTRYVQINSIGRAWLLNEGGLSARAS LGLEGFAQMVVRLSEL 474  
mouse [R] QLS--QTPGDCPIFLPDSSEMDWLAKTWRYAEFYSHEAIAHLETHLTAEAFC LALRNLPMDHPLYKLLI PHTRYVQINSIGRAWLLNEGGLSARAS LGLEGFAQMVVRLSEL 474  
xenopus QLN--QTPGCEPIFLPDPDMDWT LAKIWRNSEFQVHEVVFHLLHHTLCAEVENIATTRHLLPMCHPVYKLIHPHLRYTLEIDYLAQTLI GPNGLDQAVTGNQGVVLLARAVE SL 443  
human [S] QIQPPNPSSPTPTFLPSDPLAWL LAKIWRNSEDQLEHEIQVHLLNTHLVAEVI AVATMRCPLGLHPIFKFLI PHIRYIMEINIRARTQLI SDGGIFDKAVSTGGGHVQLLRAAQL 436  
mouse [S] QIQPPNPSSPTPTFLPSDPLAWL LAKIWRNSEDQLEHEIQVHLLNTHLVAEVI AVATMRCPLGLHPIFKFLI PHIRYIMEINIRARTQLI SDGGIFDKAVSTGGGHVQLLRAAQL 436  
cow QLQLPHKGSPPPLFLPTDPMFWL LAKIWRNSEDQLEHEIQVHLLNTHLVAEVI AVATMRCPLGLHPIFKFLI PHIRYIMEINIRARTQLI SDGGIFDKAVSTGGGHVQLLRAAQL 437  
zebrafish QLE--QKPKDTPVFLPSDPLAWL LAKIWRNSEDQLEHEIQVHLLNTHLVAEVI AVATMRCPLGLHPIFKFLI PHIRYIMEINIRARTQLI SDGGIFDKAVSTGGGHVQLLRAAQL 443

human [R] TYDSLPLPNDFVERGVQDLPGYRDS LAVNNALEKYVTEITTYYPDAEAGDPELQSWQEIFKELLCRESSGFPTCLRTVPELIRVTVITVYTC SAKHAAVNTQMEFTAMPN 594  
mouse [R] TYKSLCIPNDFVERGVQDLPGYRDS LAVNNALEKYVTEITTYYPDAEAGDPELQSWQEIFKELLCRESSGFPTCLRTVPELIRVTVITVYTC SAKHAAVNTQMEFTAMPN 594  
xenopus TYSALCLPDDIQAGVSEIPIVYFREDQRIWRAME SFASDITHYYPDSDETVSDEPELQAWAEIPIQGF LSNKNSGI PSSFATRVELIKY LTMVMTCSAQHAAVNSQDFEFSSWPN 563  
human [S] TYCSLCPDDIADRGLLGLP GALYARDA LR DHEITARYVEGIVHLFYORDIVKGDPELQAWCREITEVGLCQAQRGFPVFSQSQSLCHF LTMCVFTCQAHAADINQQLDWGWPN 556  
mouse [S] TYHSLCPDDIADRGLLGLP GALYARDA LR DHEITARYVEGIVHLFYORDIVKGDPELQAWCREITEVGLCQAQRGFPVFSQSRAQLCHF LTMCVFTCQAHAADINQQLDWGWPN 556  
cow TYSSFCPPDDIADRGLLGLP GALYARDA LR DHEITARYVEGIVHLFYORDIVKGDPELQAWCREITEVGLCQAQRGFPVFSQSQSLCHF LTMCVFTCQAHAADINQQLDWGWPN 557  
zebrafish TYRSLQPKDFLDRCGVTKVGVYRDS LMLKOVIONFVSGIVSLYVQCDSDVQEDSELQAWHDAVAVEGVDPVPEFGLASDMKTKEELITL LSVAIFTSTAQAHAATNQQFDWCAWPN 563

human [R] FPASMRNPFQTKGLTTLETMDTLPDVKTCITLLVWTL SREPDRRPLGHFPDIHFVEEAPRRSIEAFRCRLNQISHDIRCNKCLTLPYVYLDPVLENSIS I 701  
mouse [R] FPSSMRNPFQTKGLTTLETMDTLPDVKTCITLLVWTL SREPDRRPLGHFPDIHFVEEAPRRSIEAFRCRLNQISHDIRCNKCLTLPYVYLDPVLENSIS I 701  
xenopus GPSTMRKPPPTTKCTTYYQSIETLPAINTATAMVIVNLLSKEPLDQRPLGKYVNVFVEDAPKACIEQEKELSEISKDIKVRNKTRKRLTYHYLDPEEIECSI SI 670  
human [S] APCTMRPPPTTKEDVIMATVMSGLPDVQACLOMATISWHL SRPDMVPLGHKREKYFSGPKPKAVINQRTDLEKLEKEITARNEQLDWPVEYLRPSC IENSVTI 663  
mouse [S] APCTMRPPPTTKEDVIMATVMSGLPDVQACLOMATISWHL SRPDMVPLGHKREKYFSDPRTKAVLSQDADLONLEKEITARNEQLDWPVEYLRPSC IENSVTI 663  
cow APCTMRPPPTTK-DVTLEKMATL PNFHQASLQMSITVHLGRQPDIMVALGHEEYFSGPEPKAVLKGTRREE LALEKDIETRNAQLDWPVEYLRPSC IENSVTI 663  
zebrafish TPCTMRHPPPTTKEDVIMATVMSGLPDVQACLOMATISWHL SRPDMVPLGHKREKYFSDPRTKAVLSQDADLONLEKEITARNEQLDWPVEYLRPSC IENSVTI 670

Fig. S2. Alignment of zf12-LO with other 12S- and 12R-LOs. A representative selection of 12S- and 12R-LOs are aligned with zf12-LO. Amino acids depicted in red and in blue indicates zf enzyme sequence similar to S-LOs and R-LOs, respectively. Conserved amino acids are depicted in gray. Borngräber I determinant (empty triangle), Coffa determinant (empty circle), Sloane determinant (asterisk) and Jisaka/Borngräber II determinant (number symbol) are pointed out.

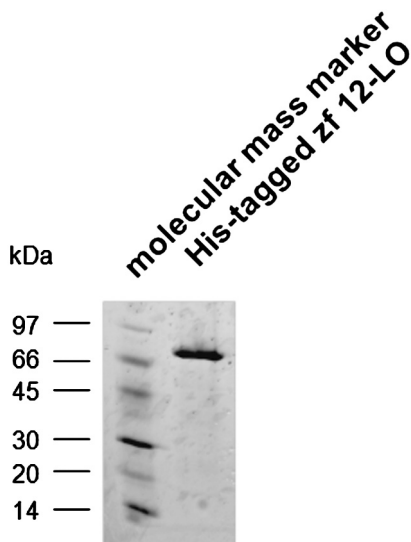

Fig. S3. SDS-PAGE of purified recombinant zf12-LO. Ni<sub>2</sub>+ column purified recombinant protein was loaded onto a 8–15% SDS-Phast-gel (Amersham Pharmacia Biotech). Gel was stained with Coomassie Brilliant blue.

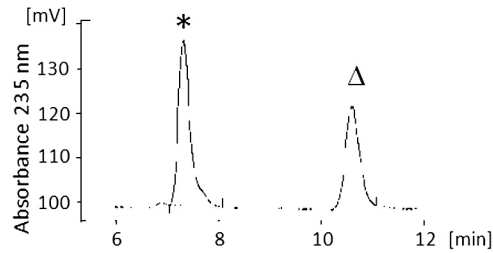

Fig. 54. RP-HPLC analysis of 12 HETE formation by zf12-LO. Asterisk: zf12-LO products; triangle: internal standard 17(*S*)-hydroxy-(13*Z*, 19*Z*, 15*E*)-docosatrienoic acid.

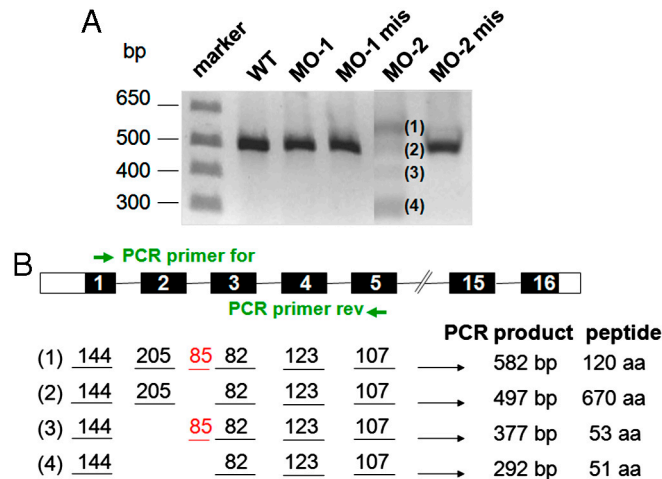

Fig. 55. Confirmation of the knock-down of zf12-LO via RT-PCR. (A) The efficiency of the knock-down by MOs was verified by RT-PCR using total RNA isolated from 20 embryos at two dpf. Electrophoretical analyses showed an amplification of the expected product from the correctly spliced mRNA (497 bp) for WT, MO-1 (250  $\mu$ M) as well as for MO-1 mis (250  $\mu$ M) and MO-2 mis (500  $\mu$ M) treated embryos. Contrary, in the sample of MO-2 (500  $\mu$ M) treated embryos four PCR products were amplified (band 1–4), which resulted from different splice variants of the mRNA. (B) The formation of the four different splice variants is illustrated. The 292 bp product corresponds to the expected splice variant, where exon 1 was directly linked to exon 3 (band 4). Additionally the PCR product (497 bp) corresponding to the correct spliced mRNA was detectable (band 2). The 582 bp (band 1) and 377 bp (band 3) products are related to variants where exon 2 and/or intron 2/3 were not spliced out. The length of the peptides translated from the different splice variants is denoted. The primers used for RT-PCR are depicted in green.
